# Supplementary material
Source: PubMed Central journal article supplement (PMC6372982)
Supplement: bm8b01445_si_001.pdf [file bm8b01445_si_001.pdf]

## Supporting Information

### **Synthetic extracellular matrices with nonlinear elasticity regulate cellular organization**

*Kaizheng Liu,<sup>a</sup> Silvia Mihaila,<sup>b</sup> Alan Rowan,<sup>c</sup> Egbert Oosterwijk,<sup>b</sup> and Paul Kouwer<sup>a,\*</sup>*

- a. Radboud University, Institute for Molecules and Materials, Heyendaalseweg 135, 6525 AJ Nijmegen, The Netherlands. E-mail: p.kouwer@science.ru.nl
- b. Radboud University Medical Centre and Radboudumc Amalia Children's hospital, Radboud Institute for Molecular Life Sciences, Department of Urology, Geert Grooteplein 26-28, PO Box 9101, 6500 HB Nijmegen, The Netherlands.
- c. The University of Queensland, Australian Institute for Bioengineering and Nanotechnology, Brisbane, QLD 4072, Australia.

# Supplementary Figures

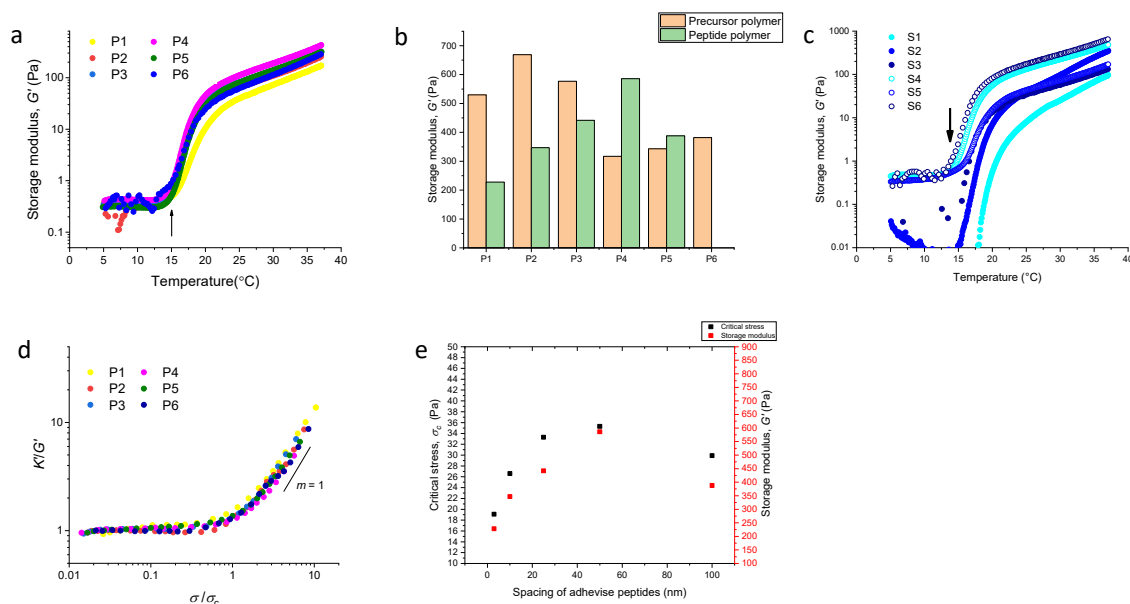

**Supplementary Figure 1.** Mechanical properties of the hydrogels. (a, c) Temperature ramps of **P1-P6** and **S1-S6**. All gels have a LCST at approximately  $15^{\circ}\text{C}$ . (b) Storage modulus of **P1-P6** gels before and after GRGDS conjugation. Before being functionalised with adhesive peptides, polymers with denser azide moieties (**P1**, **P2**, **P3**) formed relatively stiffer gels (500-700 Pa), compared with polymers with sparse azides (300-500 Pa). As a consequence of peptide addition by click reaction, stiffness of polymer gels with denser azide moieties decreased (**P1**, **P2**, **P3**). In contrast, **P4** showed an increase instead and **P5** remained the similar value in stiffness. It is likely that high density of additional peptides disrupts the integrity of polymer network and decrease the gel stiffness. (d) The  $K'/G'$  -  $\sigma_c$  curves of **P1-P6** collapse to a single master curve when scaled to  $G'$  and  $\sigma_c$ , with a stiffening index  $m=1$ . (e) Correlation of storage moduli,  $G'$  and critical stress and  $\sigma_c$  of gels with the spacing of the peptide on the single polymer chain.

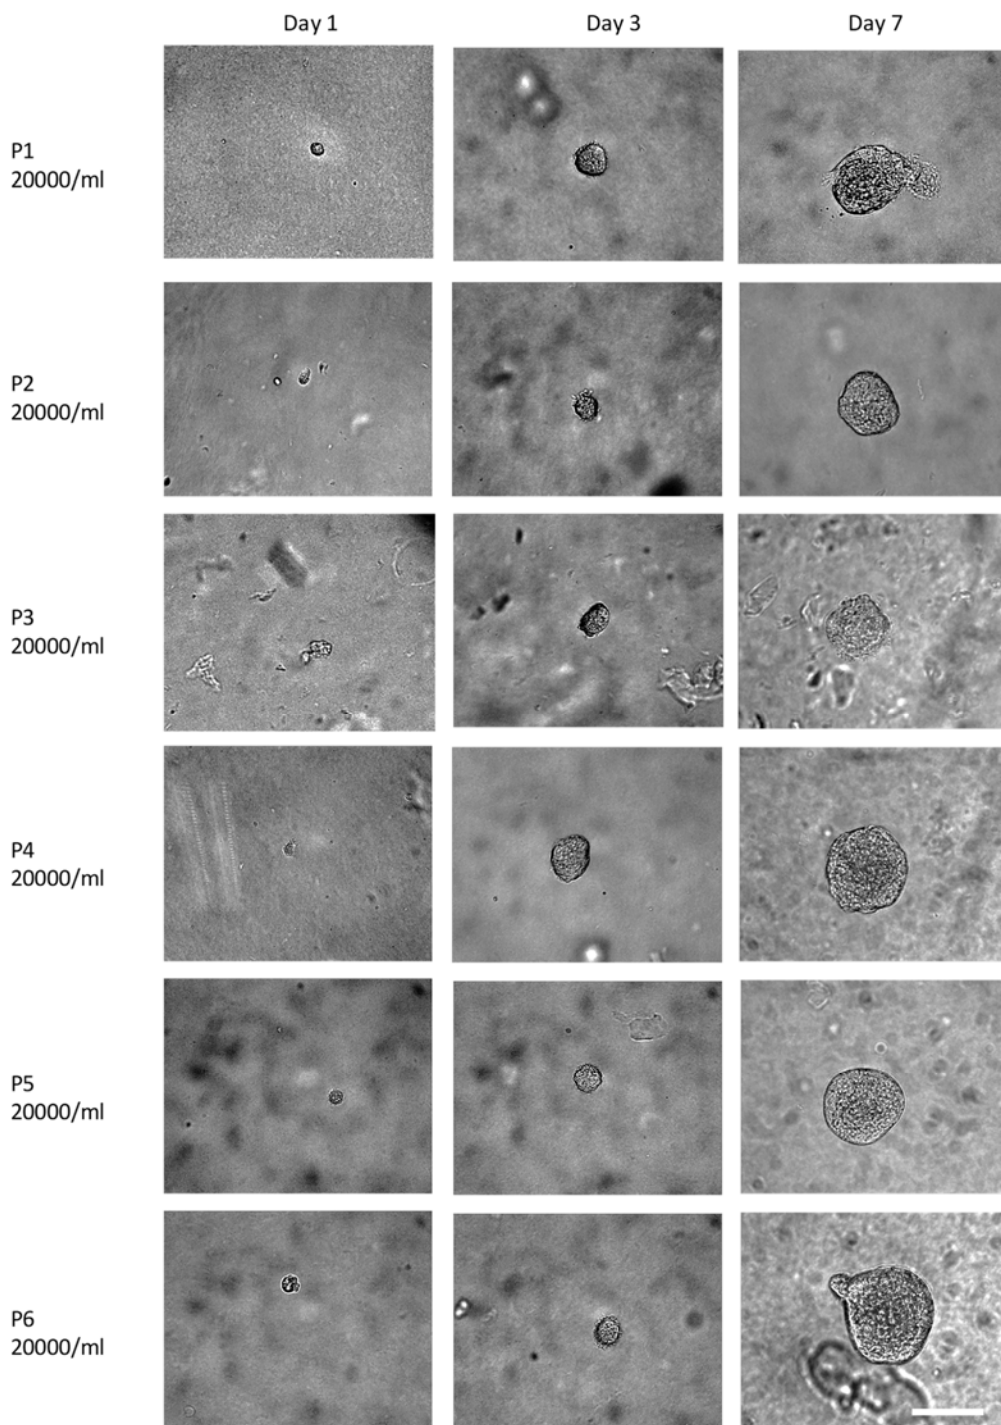

**Supplementary Figure 2.** Morphological change of human bladder smooth muscle cells (hbSMCs) with time in P1-P6. Scale bar: 70  $\mu\text{m}$ .

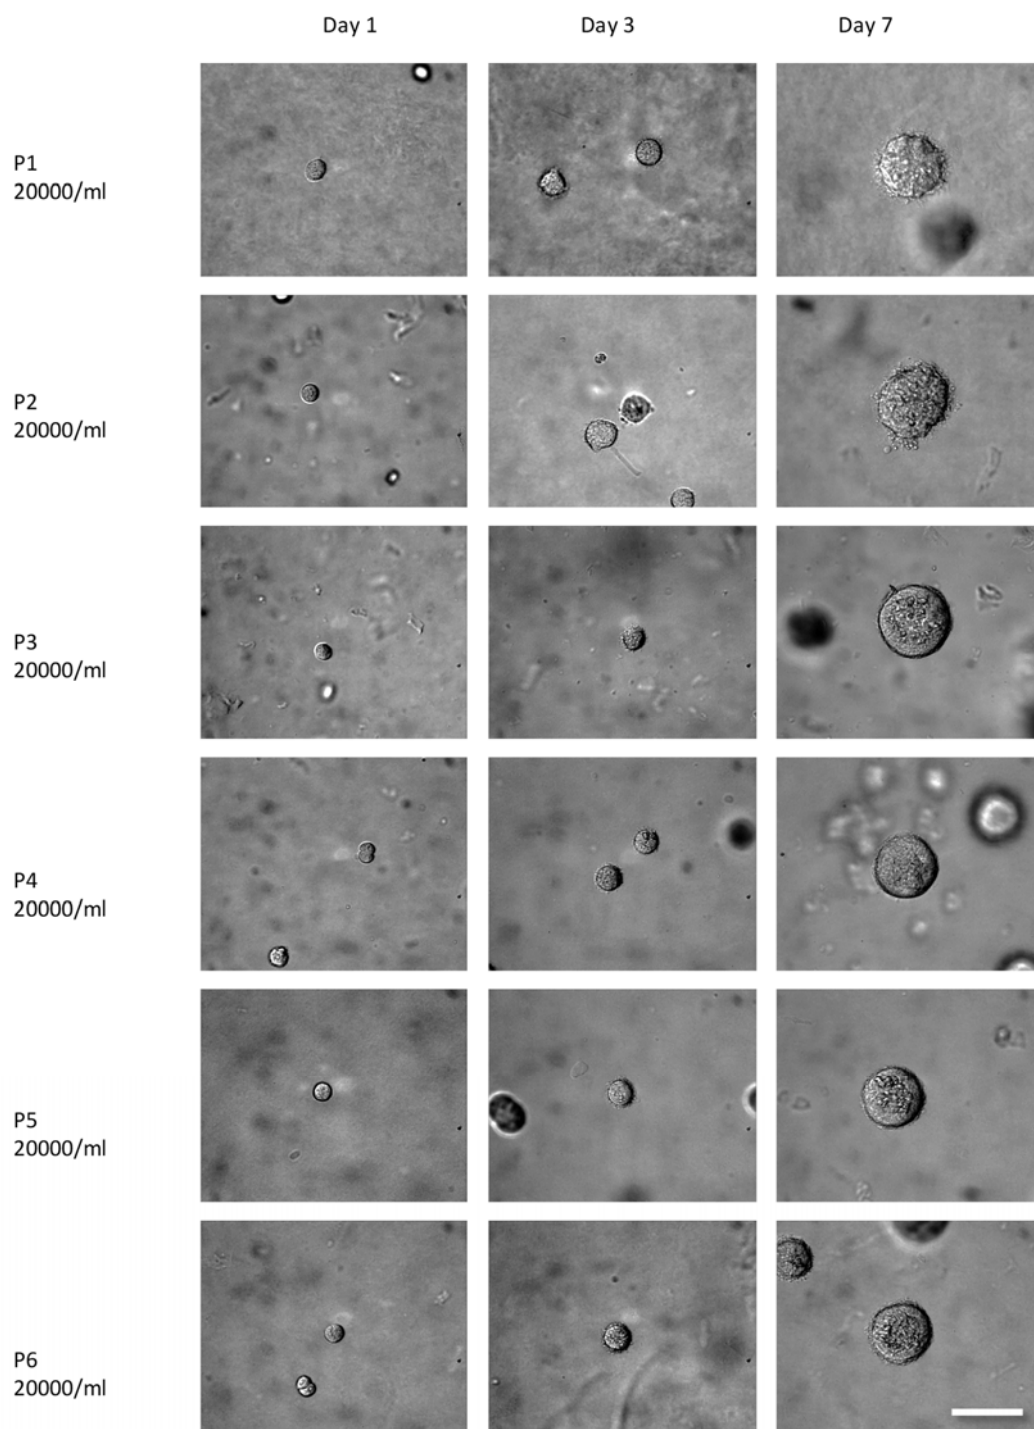

**Supplementary Figure 3.** Morphological change of HeLas with time in P1-P6. Scale bar: 70  $\mu$ m.

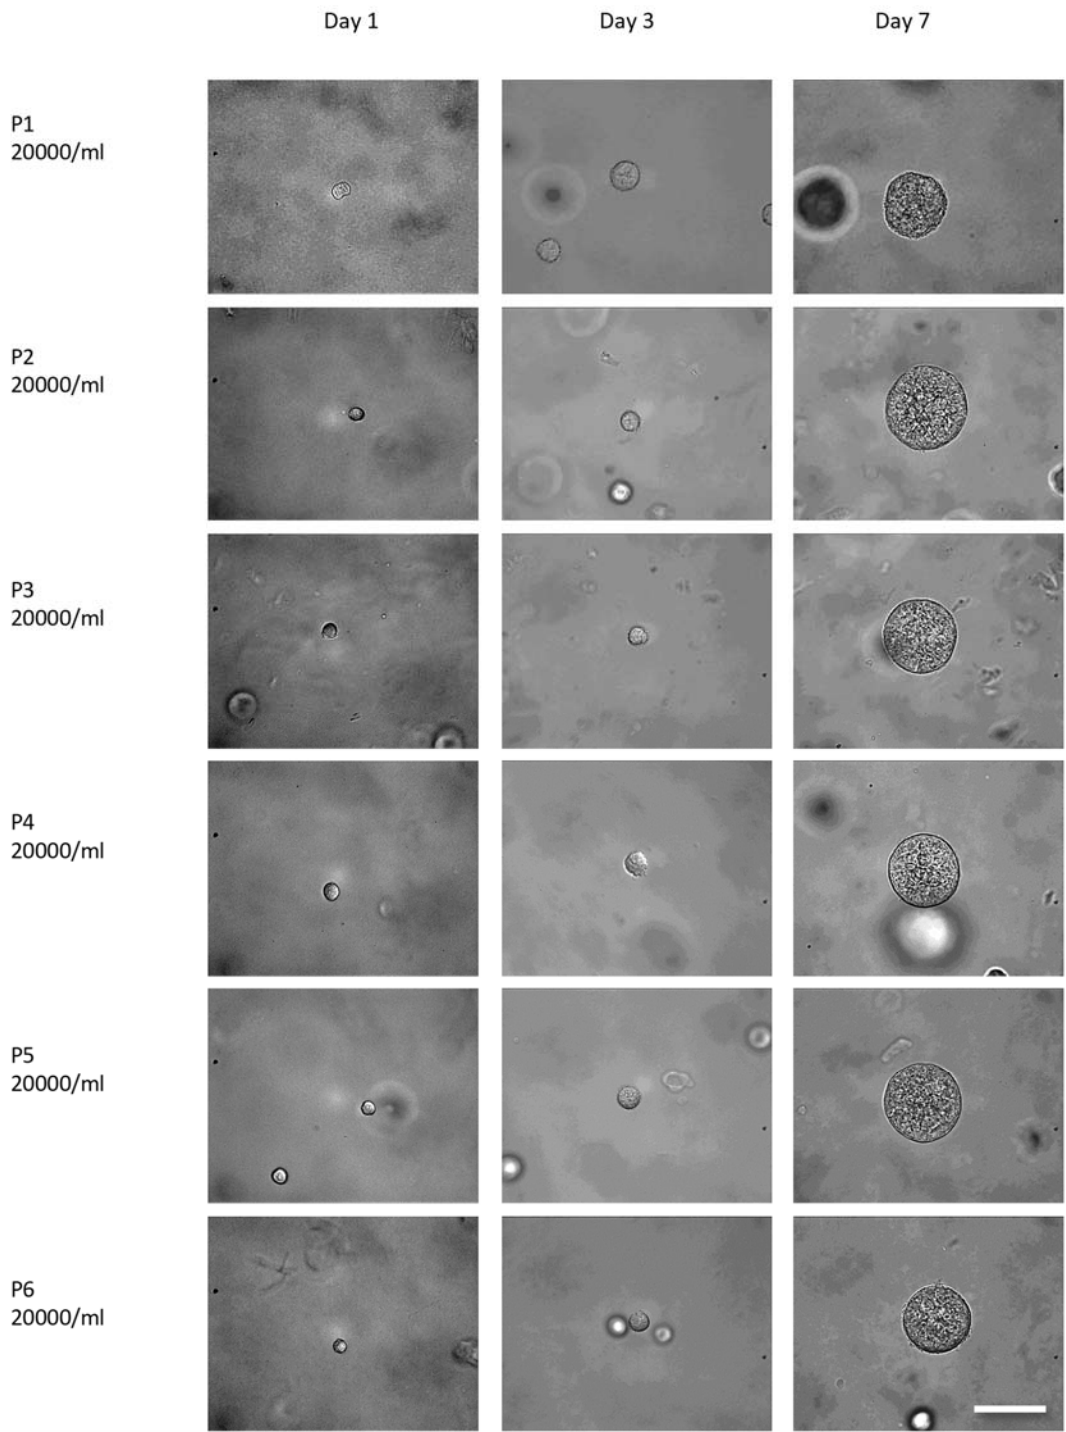

**Supplementary Figure 4.** Morphological change of T24 with time in P1-P6. Scale bar: 70  $\mu$ m.

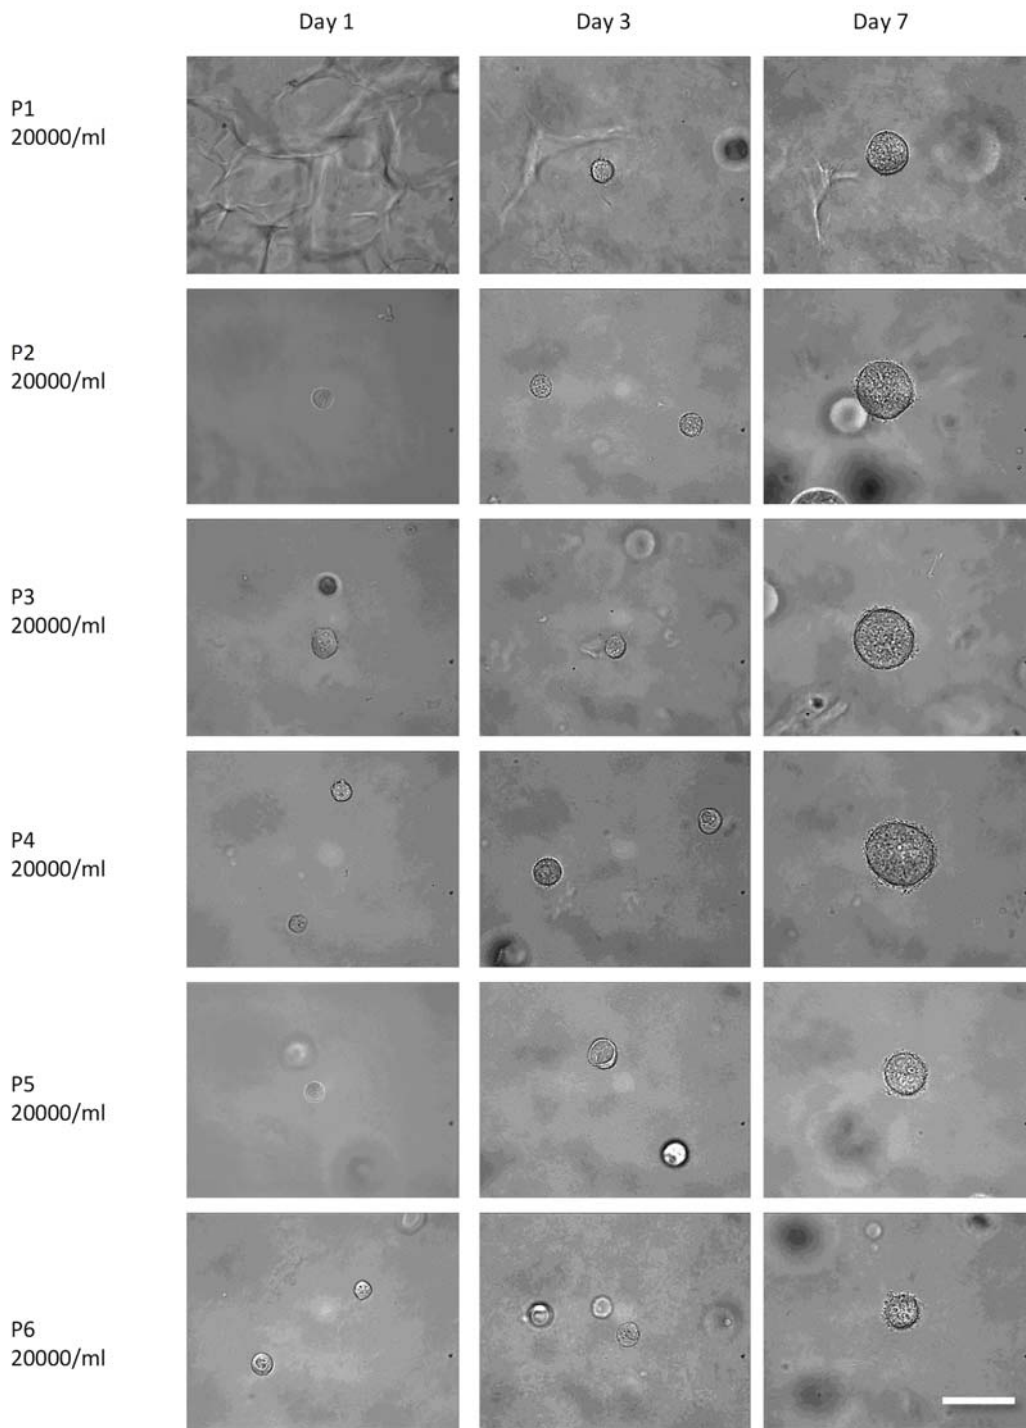

**Supplementary Figure 5.** Morphological change of SKRC52s with time in **P1-P6**. Note that fluorescence staining of the vessel-like structure proved that these patterns were not from cellular structures. We suppose that the phenomenon is due to optical reflection of cell-gel constructs. Scale bar: 70  $\mu\text{m}$ .

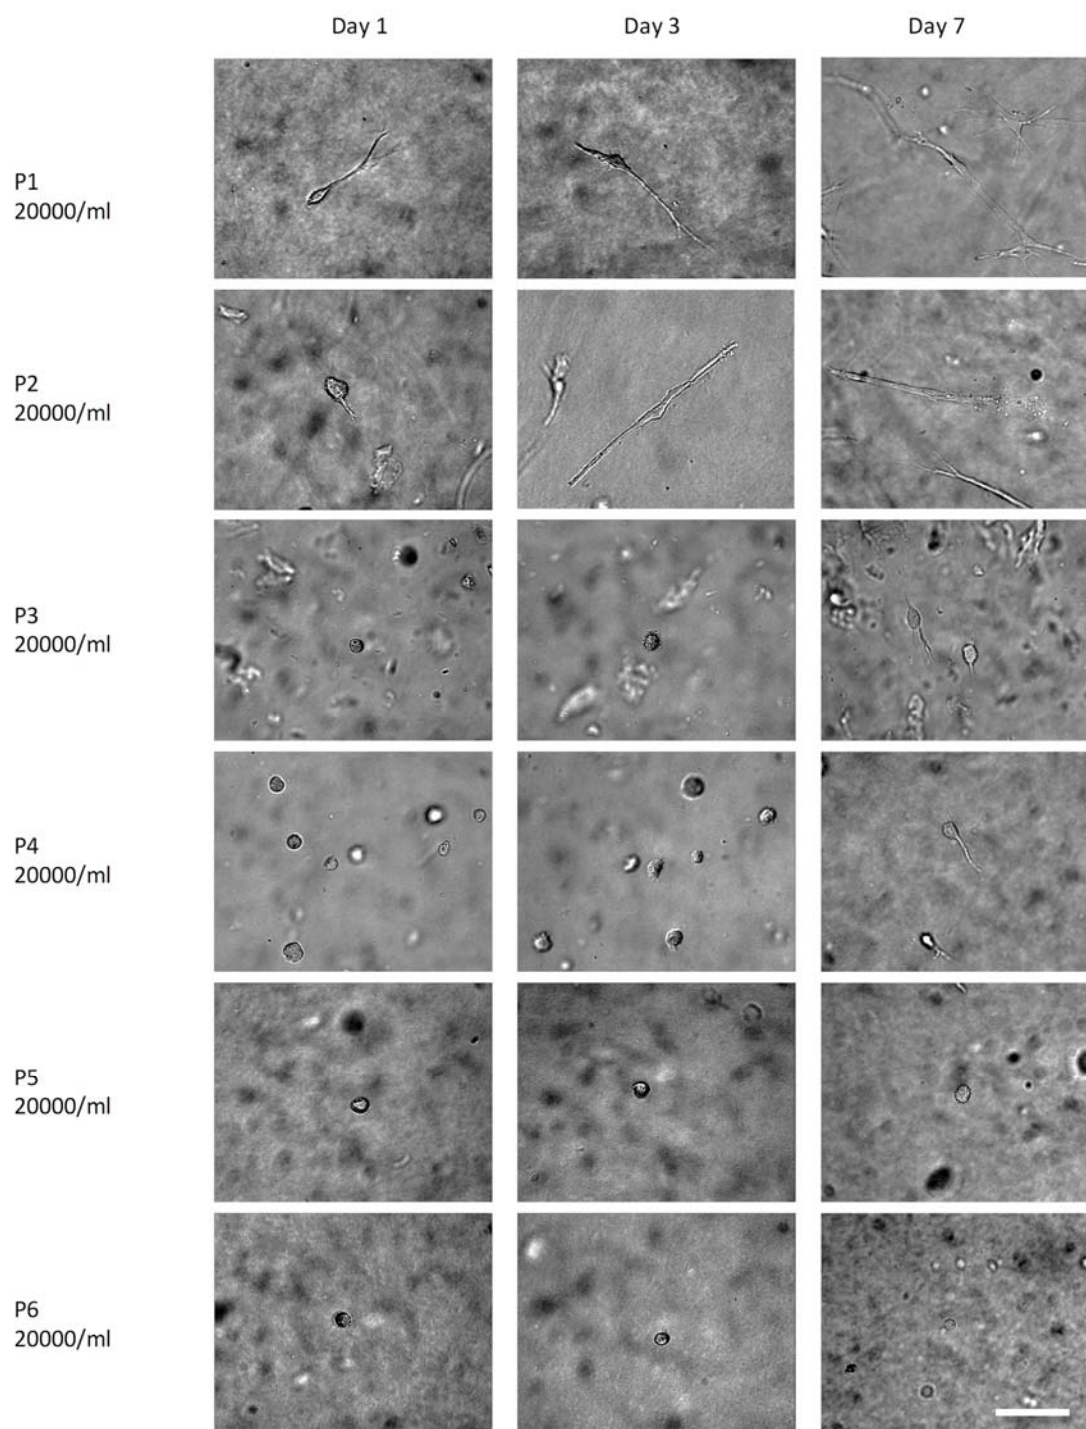

**Supplementary Figure 6.** Morphological change of hASCs with time in P1-P6. Scale bar: 70  $\mu$ m.



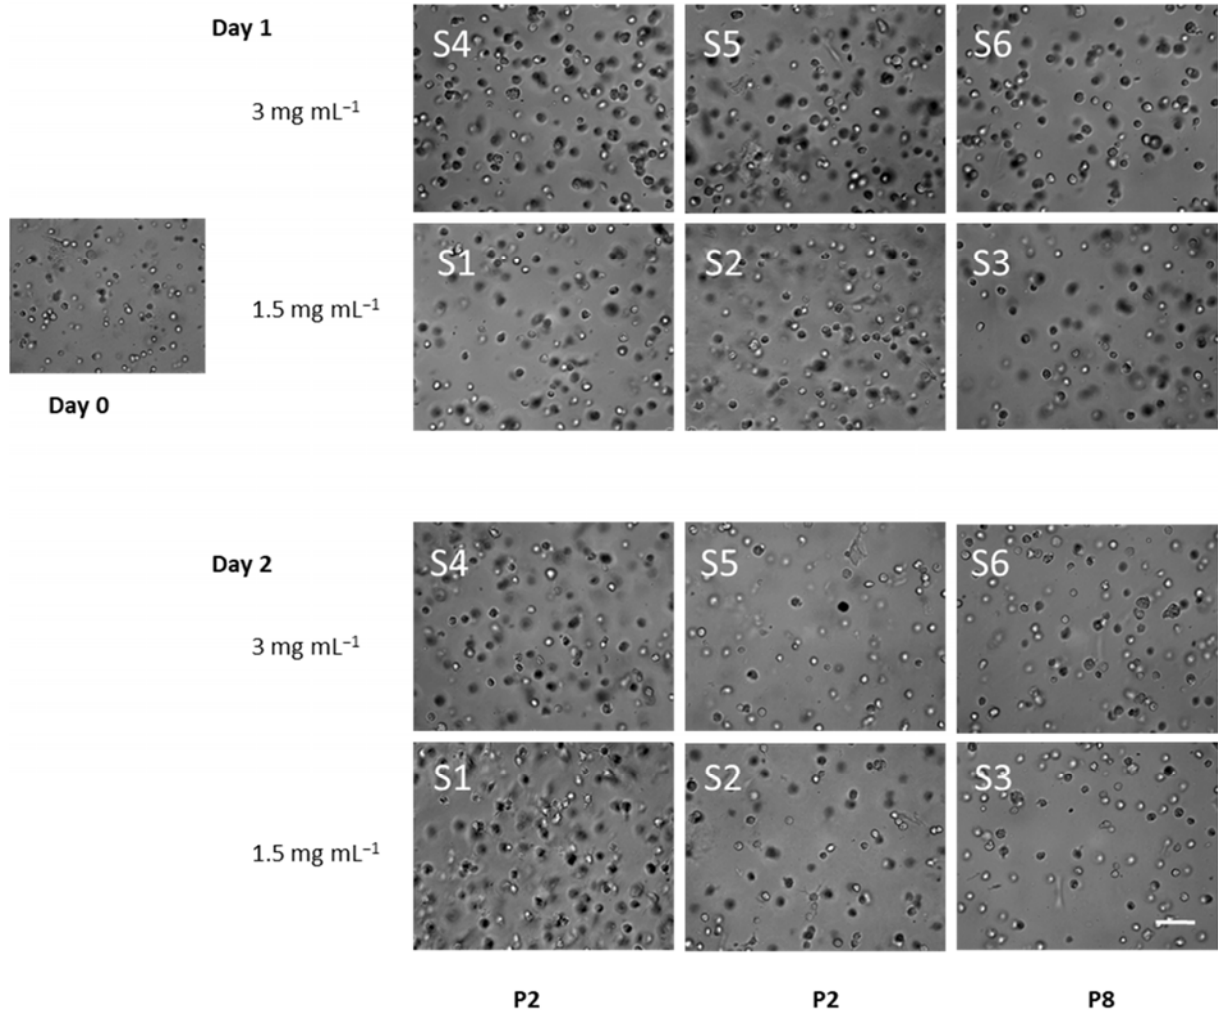

**Supplementary Figure 7.** Morphologies of hASCs at day 0, 1 and 2 in S1-S6. Scale bar: 70  $\mu\text{m}$ .



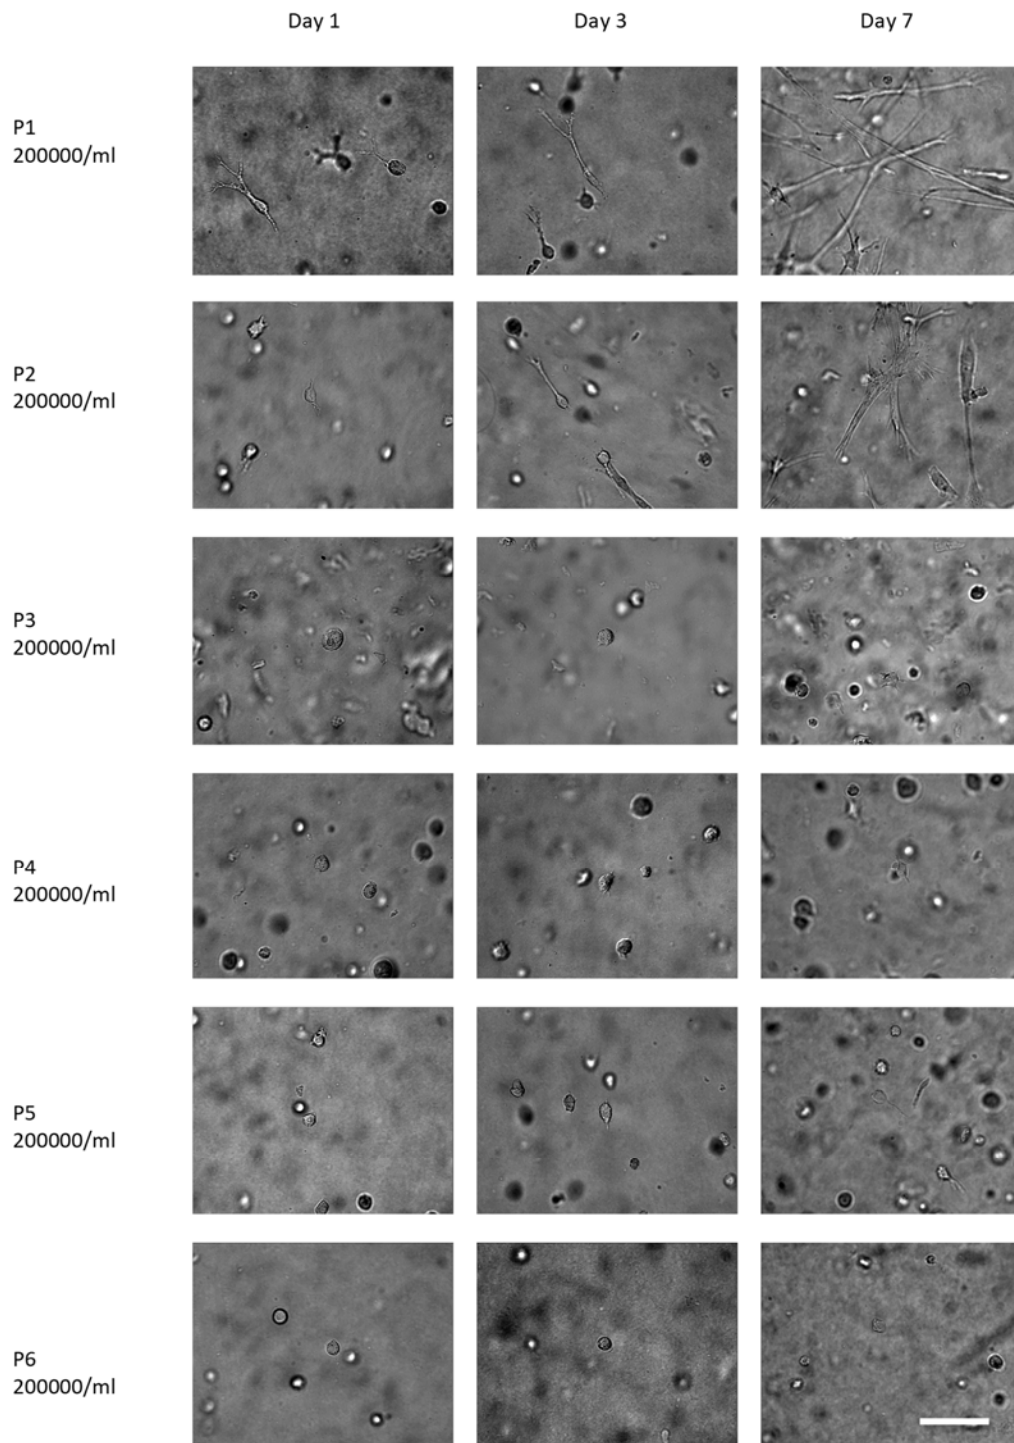

**Supplementary Figure 8.** Morphological change of hASCs in P1-P6 with a higher cell density (200,000 cells mL<sup>-1</sup>). The cell response is similar with the lower density shown in the main text. Scale bar: 70 μm.

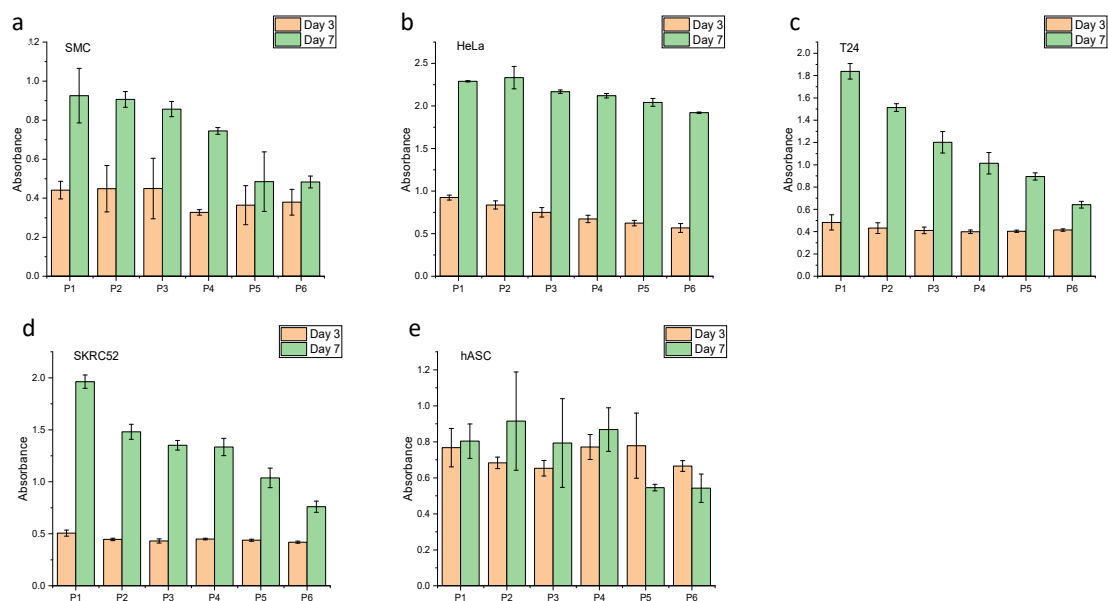

**Supplementary Figure 9.** Crude data of the WST-1 proliferation assay from Figure 4, showing the measured absorbance at  $\lambda = 450$  nm without normalization is shown. (a, b, c, d, e) represent the proliferation of SMCs, HeLas, T24s, SKRC52s and hASCs respectively. Cell density: 20,000 cells mL<sup>-1</sup>.

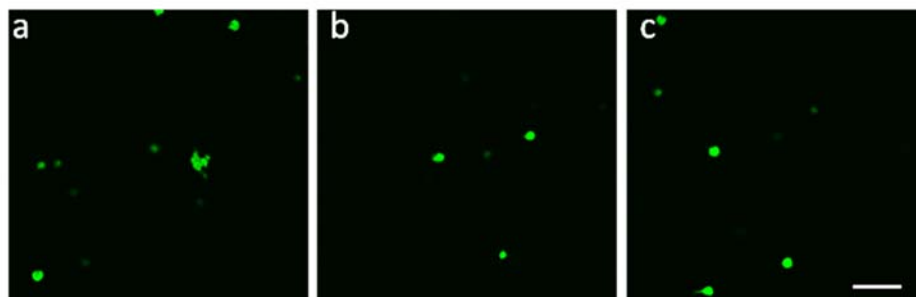

**Supplementary Figure 10.** Live/Dead staining of hASCs in **P2**, 48h after encapsulation. Three representative images at different gel areas prove that stem cells have high viability in PIC-RGD gels. Green: live cells. Red: dead cells. NB. no dead cell is observed in these images. Scale bar: 100  $\mu$ m.

The staining protocol is adapted from the product manual (Invitrogen, Thermo Fisher, USA). In brief, cell culture medium on top of gels was gently removed. A 2  $\mu$ M calcein AM and 4  $\mu$ M EthD-1 working solution was prepared in  $\alpha$ -MEM medium and added onto gel samples. After a 30-minute incubation in the cell incubator, all samples were washed by pre-warmed 0.9% NaCl and imaged by confocal fluorescence microscope.
